# Supplementary material for: Diet and exercise changes following bone densitometry in the Patient Activation After DXA Result Notification (PAADRN) study
Source: Springer Nature journal article supplement (doi:10.1007/s11657-017-0402-8), 2018-01-06
Supplement: MOESM1 [file 15347870]

**Supplemental Material**

Table S1: Covariate Distributions of Study Participants.

|  | | Intervention  (Letter + Brochure) | Control | p-value  (Intervention vs. Control) |
| --- | --- | --- | --- | --- |
| N of participants | | 3,898 | 3,851 | -- |
| OSE-Diet, mean (s.d.) | | 8.54 (1.67) | 8.62 (1.64) | **0.044** |
| OSE-Exercise, mean (s.d.) | | 7.72 (2.19) | 7.76 (2.19) | 0.527 |
| Prior DXA, number (%) | | 2606 (66.9) | 2590 (67.3) | 0.719 |
| Fracture Risk | Low, number (%) | 2058 (52.8) | 1945 (50.5) | **0.044** |
| Moderate, number (%) | 1255 (32.2) | 1257 (32.6) |
| High, number (%) | 585 (15.0) | 649 (16.9) |
| Site | University of Iowa | 836 (21.4) | 849 (22.0) | **0.002** |
| University of Alabama at Birmingham | 1622 (41.6) | 1458 (37.9) |
| Kaiser Permanente Georgia | 1440 (36.9) | 1544 (40.1) |
| Age, mean (s.d.) | | 66.5 (8.4) | 66.7 (8.2) | 0.246 |
| Women, number (%) | | 3259 (83.6) | 3230 (83.9) | 0.750 |
| Race / Ethnicity | White, number (%) | 2981 (76.5) | 2954 (76.7) | 0.699 |
| Black, number (%) | 842 (21.6) | 814 (21.1) |
| Other, number (%) | 75 (1.9) | 83 (2.2) |
| Education | Some high school, number (%) | 161 (4.2) | 140 (3.7) | 0.749 |
| Completed high school, number (%) | 819 (21.2) | 836 (21.9) |
| Some college, number (%) | 1290 (33.4) | 1269 (33.2) |
| Completed college, number (%) | 785 (20.3) | 762 (19.9) |
| Graduate school, number (%) | 809 (20.9) | 814 (21.3) |
| Literacy, mean (s.d.) | | 4.31 (0.86) | 4.32 (0.88) | 0.406 |
| Subjective Numeracy, mean (s.d.) | | 4.58 (1.03) | 4.58 (1.05) | 0.717 |
| Comorbid Conditions | COPD, number (%) | 259 (6.7) | 265 (6.9) | 0.680 |
| Depression, number (%) | 902 (23.2) | 885 (23.0) | 0.878 |
| Prior Fracture, number (%) | | 1043 (26.9) | 1051 (27.3) | 0.630 |
| Health Habits | Current smoker, number (%) | 295 (7.6) | 295 (7.7) | 0.873 |
| Past smoker, number (%) | 1478 (37.9) | 1388 (36.1) | 0.096 |
| Self- Reported Health Status | Excellent, number (%) | 445 (11.4) | 494 (12.8) | 0.329 |
| Very Good, number (%) | 1280 (32.9) | 1253 (32.6) |
| Good, number (%) | 1443 (37.1) | 1373 (35.7) |
| Fair, number (%) | 571 (14.7) | 566 (14.7) |
| Poor, number (%) | 150 (3.9) | 159 (4.1) |

Note: Boldface indicates statistical significance (p < 0.05). Fracture risk is estimated from the baseline FRAX® score: high is >20% 10-year fracture risk; moderate is 10-20%; low is <10%.

Abbreviations: DXA = Dual energy X-ray Absorptiometry, OP = osteoporosis, COPD = chronic obstructive pulmonary disease
